# Supplementary material
Source: publisher site journal article supplement (https://www.spandidos-publications.com/7125/downloadSupplementary)
Supplement: Supplementary file 1 [file downloadSupplementary]

## Sheet: Sheet1
Table SII. Total for the Hyp and non-Hyp groups.
A, Hyp group (n=16)
Variable	Total	Mean	Median
NCBI build	NA	NA	NA
Center	NA	NA	NA
Samples	16	NA	NA
No. of genes	14	NA	NA
In-frame deletion	4	0.25	0
In-frame insertion	1	0.062	0
Missense mutation	40	2.5	1
Nonsense mutation	1	0.062	0
Splice site	1	0.062	0
Total	47	2.938	2
B, Non-Hyp group (n=48)
Variable	Total	Mean	Median
NCBI build	NA	NA	NA
Center	NA	NA	NA
Samples	45	NA	NA
No. of genes	26	NA	NA
Frame shift deletion	2	0.044	0
Frame shift insertion	4	0.089	0
In-frame deletion	19	0.422	0
In-frame insertion	2	0.044	0
Missense mutation	74	1.644	1
Nonsense mutation	9	0.2	0
Splice site	3	0.067	0
Total	113	2.511	2
Hyp group, hypertension group; NA, not applicable; NCBI, National Center for Biotechnology Information; non-Hyp group, non-hypertension group.
